# Supplementary material for: Genomic study of taste perception genes in African Americans reveals SNPs linked to Alzheimer’s disease
Source: PubMed Central journal article supplement (PMC11405524; doi:10.1038/s41598-024-71669-9), 2024-09-16

**Title: Distribution of the raw expression (read counts) of the mRNAs investigated or relevant for the analysis. The numbers plotted are available in Supplemental Table T1E**

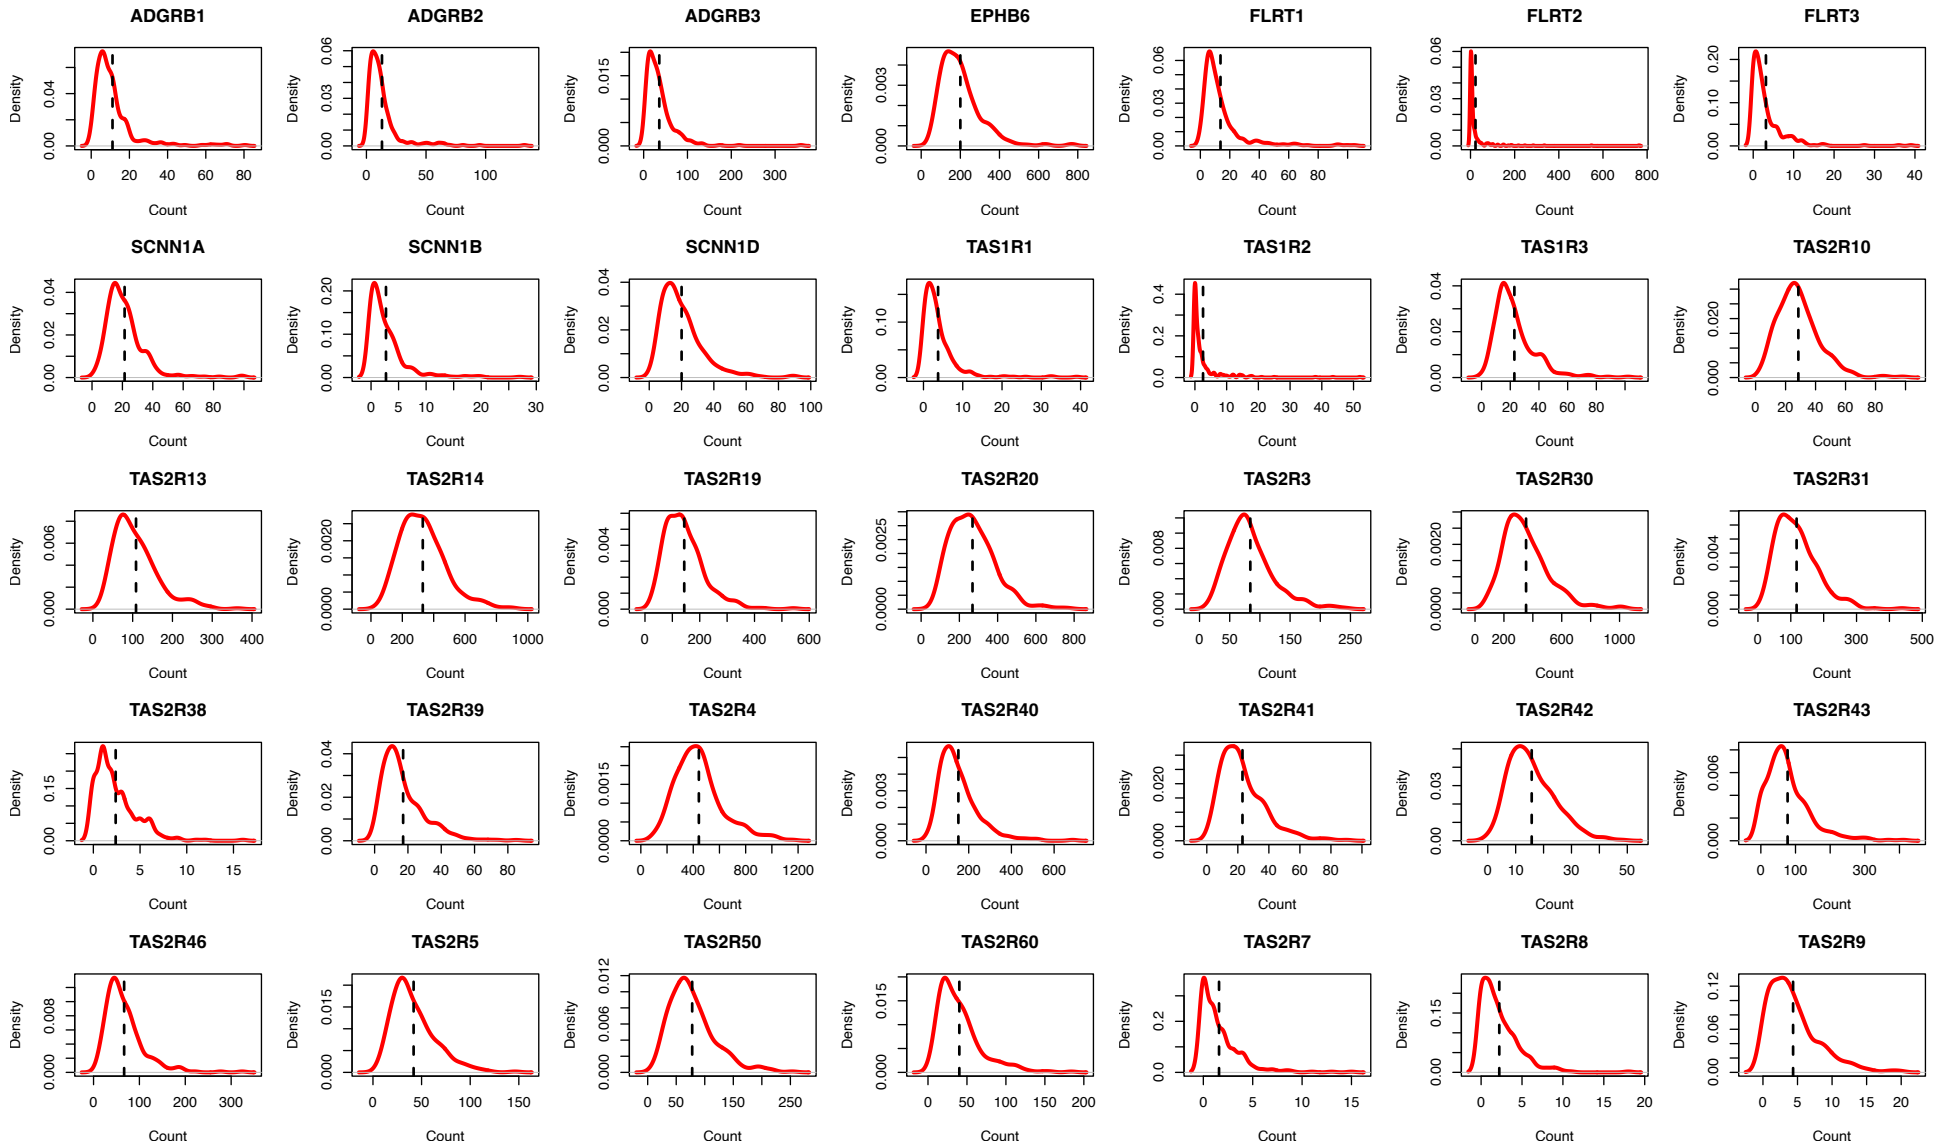

Supplement: 41598_2024_71669_MOESM1_ESM.pdf [file 41598_2024_71669_MOESM1_ESM.pdf]
